# Supplementary material for: Magnetic bead-based mimic enzyme-chromogenic substrate and silica nanoparticles signal amplification system for avian influenza A (H7N9) optical immunoassay
Source: Royal Society of Chemistry journal article supplement (doi:10.1039/c7ra06273g), 2017-01-01
Supplement: c7ra06273g1.pdf [file c7ra06273g1.pdf]

## Supporting Information

# **Magnetic Bead-Based Mimic Enzyme-Chromogenic Substrate and Silica Nanoparticles Signal Amplification System for Avian Influenza A (H7N9) Optical Immunoassay**

Dan Su<sup>a</sup>, Hanyun Li<sup>a</sup>, Jinlin Li<sup>b</sup>, Yali Liu<sup>a</sup>, Mi Peng<sup>a</sup>, Bingwei Feng<sup>a</sup>, Pengfei Xu<sup>a</sup>,  
Yonggui Song<sup>a\*</sup>

<sup>a</sup> *National Pharmaceutical Engineering Center for Solid Preparation in Chinese  
Herbal Medicine, Jiangxi University of Traditional Chinese Medicine, 56 Yangming  
Road, Nanchang 330006, China.*

<sup>b</sup> *Nanchang Institute for Food and Drug Control, Nanchang 330038, China*

---

\*Corresponding author: Tel/Fax: +86 791 87119632. E-mail:  
songyonggui1999@163.com (Yonggui Song).

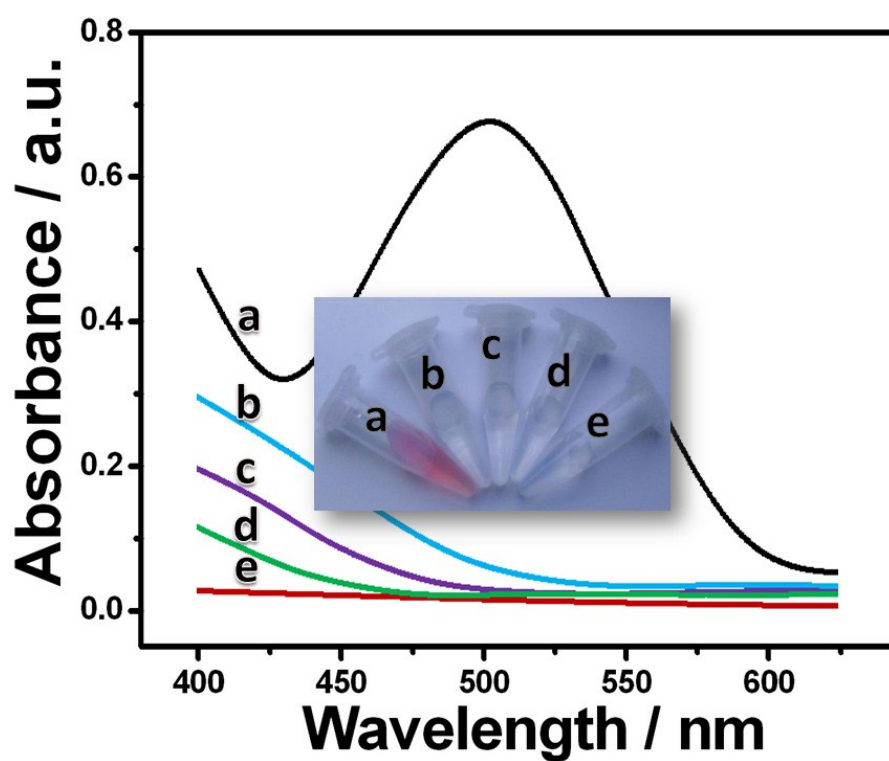

**Fig. S1.** UV-vis absorption spectra of (a) GOx + glucose + hemin + 4-AAP/phenol system, (b) GOx + hemin + 4-AAP/phenol system, (c) GOx + glucose + hemin, (d) GOx + glucose + 4-AAP/phenol system, and (e) glucose + hemin + 4-AAP/phenol system, respectively (inset: the corresponding photographs for curve (a), (b), (c), (d), (e)).

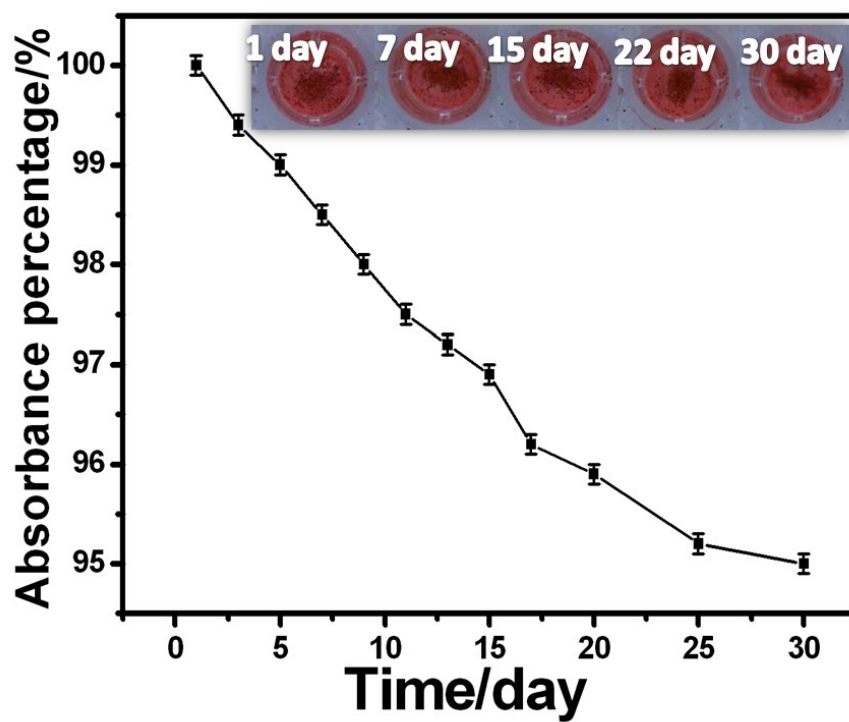

**Fig. S2.** The stability of the MB-MEMSCI. Inset: The optical immunoassay results after mAb-MBs and GOx-Red-SiNPs-pAb were stored for: 1 day, 7days, 15 days, 22 days, and 30 days.

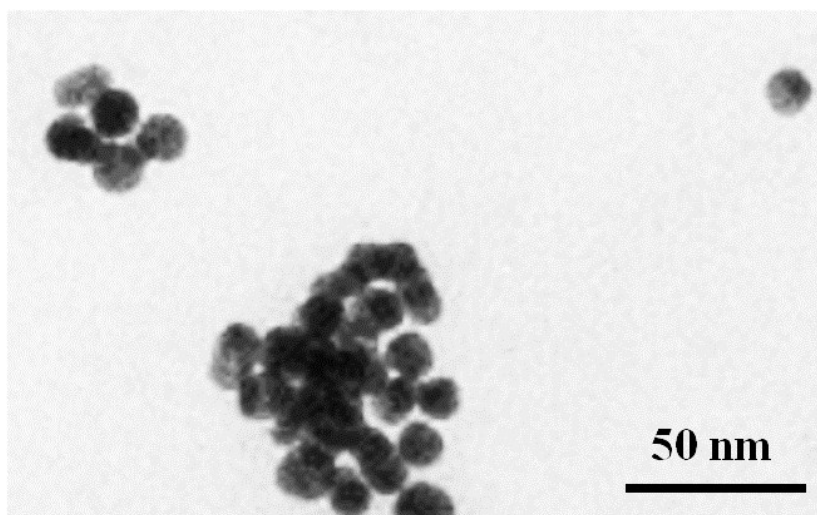

**Fig. S3.** TEM image of AuNPs.

### **Synthesis of Gold nanoparticles (AuNPs)**

Gold nanoparticles (AuNPs) was obtained according to the following steps. In brief, 1 mL of 1% HAuCl<sub>4</sub> and 100 mL ultra-pure water were mixed in a 250 mL flask. 5 mL of 1% sodium citrate solution was added quickly to the mixture after boiling, and the boiling of the mixture was maintained for 15 min. As a result, the color of the solution turned to wine red, implying the diameter of gold nanoparticles was between 10 nm and 20 nm. And colloidal gold solution was be stored at 4 °C.

### **Synthesis of pAb-AuNPs**

Antibody modified AuNps (pAb-AuNPs) was obtained as follows: 40  $\mu$ L pAb and 1 mL AuNPs suspension was mixed and incubated at 4 °C for 12 h. The pAb-AuNPs was separated by centrifugation at 10000rpm and rinsed three times with PBS, then dropped with 1 mL 0.2% BSA at 4 °C for 1 h, then separated by centrifugation at 10000rpm and rinsed three times with PBS, and dispersed in 1 mL PBS, stored at 4 °C for use.

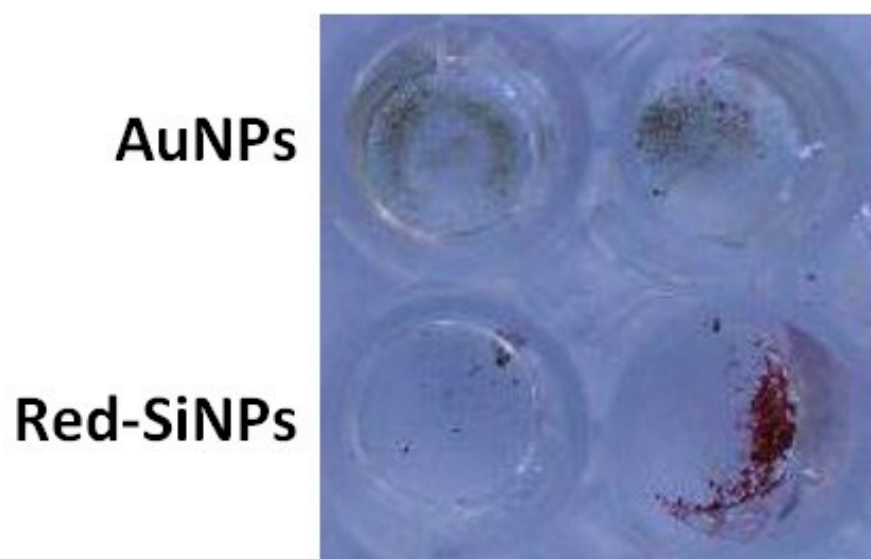

**Fig. S4.** The test results of 6 ng/mL H7N9 AIV (right) and PBS (left), pAb-AuNPs (up) and pAb-Red-SiNPs (down) were separately used as signal label.

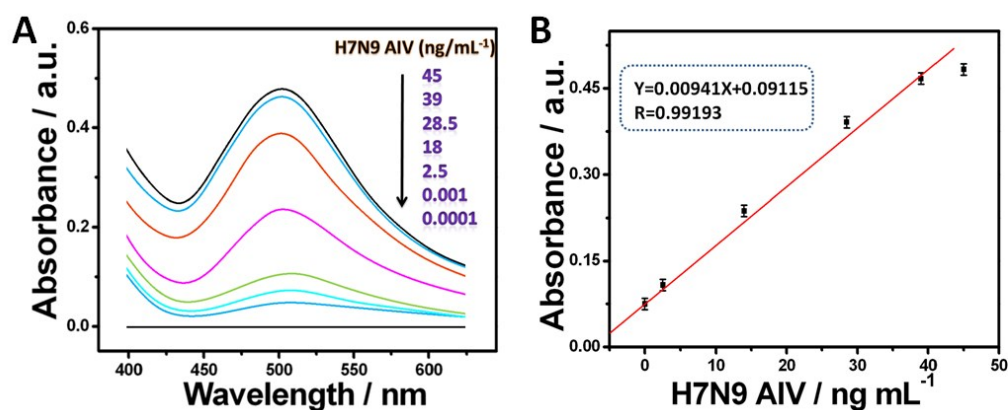

**Fig. S5.** (A): Absorbance intensity of the developed immunoassay influenza virus immunosensors without color enhanced multifunctional silica nanoparticles by coupling with the 4-AAP/phenol strategy toward different concentration H7N9 AIV standards. (B): Calibration plots of the developed immunoassay influenza virus immunosensors without color enhanced multifunctional silica nanoparticles by coupling with the 4-AAP/phenol strategy toward different concentration H7N9 AIV standards.

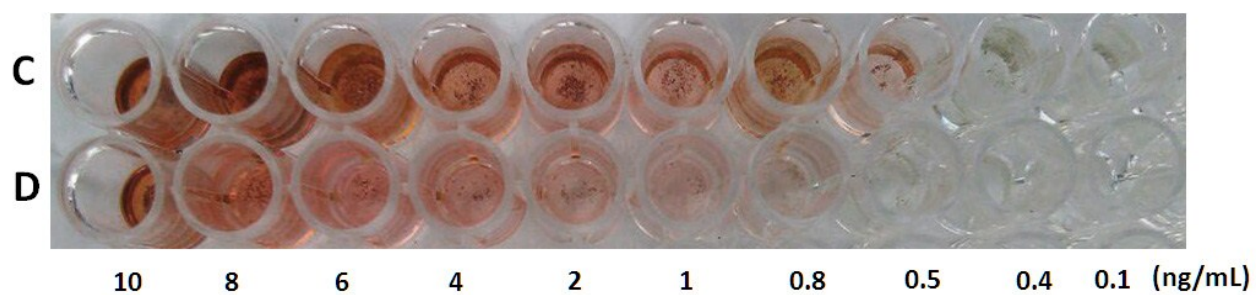

**Fig. S6.** The sensitivity results of optical MB-MEMSCI with 1 mL (A) and 400  $\mu$ L (B) of H7N9 AIV, concentration of H7N9 AIV was changed from 10 ng/mL to 0.1 ng/mL (from left to right).

Table S1 Comparison of analytical properties of the developed immunoassay influenza virus immunosensors.

| Method  | Antigen               | Detection<br>limit (pg/mL) | References |
|---------|-----------------------|----------------------------|------------|
| LSV     | H7N9                  | 6.8                        | 15         |
| DPV     | H9N2                  | 1000                       | 16         |
| EIS     | influenza A virus     | 8000                       | 17         |
| QCM     | Human influenza virus | $10^7$                     | 18         |
| QCM     | hemagglutinin         | $2.6 \times 10^5$          | 19         |
| SPR     |                       | $7.2 \times 10^5$          |            |
| EIS     | Peptides of AI H5     | 2.2                        | 20         |
| EIS     | Peptides of AI H5     | 0.6                        | 21         |
| OSVW    |                       | 0.9                        |            |
| EIS     | H7N1                  | $5 \times 10^6$            | 22         |
| ELISA   | H7N9                  | $6.25 \times 10^3$         | 24         |
| UV-vis  | H7N9                  | 3.5                        | This work  |
| visible |                       | 500                        |            |



Abbreviations: LSV—linear sweep voltammetry; DPV—differential pulse voltammetry; EIS—electrochemical impedance spectroscopy; QCM—quartz crystal microbalance; SPR—surface plasmon resonance; OSVW—Osteryoung square-wave voltammetry.

Table S2 Comparison of analytical properties of the developed immunoassay influenza virus immunosensors with and without color enhanced multifunctional silica nanoparticles.

| Method                   | Antigen | linear range                  | Detection limit          |
|--------------------------|---------|-------------------------------|--------------------------|
| <b>Without red-SiNPs</b> | H7N9    | 0.53–39.0 ng mL <sup>-1</sup> | 0.17 ng mL <sup>-1</sup> |
| <b>With red-SiNPs</b>    | H7N9    | 0.01–50.0 ng mL <sup>-1</sup> | 3.5 pg mL <sup>-1</sup>  |

**Table S3.** Recovery tests of H7N9 in chicken serum samples based on Real Time RT-PCR Kit and the MB-MEMSCI.

| <b>Methods</b>                  | <b>No.</b> | <b>Added<br/>(ng mL<sup>-1</sup>)</b> | <b>Found<br/>( ng mL<sup>-1</sup>)</b> | <b>RSD<br/>(%)</b> | <b>Recovery<br/>(%)</b> |
|---------------------------------|------------|---------------------------------------|----------------------------------------|--------------------|-------------------------|
| <b>Real Time<br/>RT-PCR Kit</b> | 1          | 10                                    | 9.51                                   | 3.43               | 95.10                   |
|                                 | 2          | 20                                    | 21.05                                  | 4.37               | 105.25                  |
|                                 | 3          | 30                                    | 28.56                                  | 5.81               | 95.20                   |
| <b>MB-MEMSCI</b>                | 1          | 10                                    | 9.85                                   | 1.85               | 98.50                   |
|                                 | 2          | 20                                    | 19.54                                  | 1.99               | 97.70                   |
|                                 | 3          | 30                                    | 28.97                                  | 1.59               | 96.57                   |

Design of primers and probes: According to the HA sequence of avian influenza virus H7N9 in GenBank database recent three years, a pair of primers and probe has been designed (Provided by the Shanghai Ying Wei Jie Ji Trading Co.).

The primer and probe sequence are listed as follows: The primer sequence of upstream (H7N9-F) is 5'-TGCAGAATAGAATA-CAGATAGAC-3', the primer sequence of downstream (H7N9-R) is 5'-ACCGCATGTTTCCATTCT-3', and the probe primer sequence (H7N9-B) is FAM5'-TGATGC-CCCGAAGCTAAACCA-3' BHQ1.

Amplified conditions of real-time RT-PCR: 30 min at 42°C, 3min at 95°C, 1 cycles; 30s at 95°C, 40s at 60°C, 40 cycles; 10 min at 72°C. After the end of RT-PCR reaction, 5µL PCR products were identified by electrophoresis in 10g / L agarose gel.

Table S4. Comparison of cost and time spent of the Avian influenza virus ( H7N9 )

Real Time RT-PCR Kit and the developed MB-MEMSCI.

| <b>Methods</b>                  | <b>Assay time</b> | <b>Ten test cost<br/>(\$)</b> |
|---------------------------------|-------------------|-------------------------------|
| <b>Real Time<br/>RT-PCR Kit</b> | 3h                | 617                           |
| <b>MB-MEMSCI</b>                | 1h                | About 1/10 of RT-PCR          |
